# Axon Diameter Measurements using Diffusion MRI are Infeasible

Michael Paquette<sup>1</sup>, Cornelius Eichner<sup>1</sup>, Thomas R. Knösche<sup>1</sup>, and  
Alfred Anwander<sup>1</sup>

<sup>1</sup>Max Planck Institute for Human Cognitive and Brain Sciences,  
Leipzig, Germany

## Abstract

The feasibility of non-invasive axonal diameter quantification with diffusion MRI is a strongly debated topic due to the neuroscientific potential of such information and its relevance for the axonal signal transmission speed. It has been shown that under ideal conditions, the minimal diameter producing detectable signal decay is bigger than most human axons in the brain, even using the strongest currently available MRI systems. We show that resolving the simplest situations including multiple diameters is unfeasible even with diameters much bigger than the diameter limit. Additionally, the recently proposed effective diameter resulting from fitting a single value over a distribution is almost exclusively influenced by the biggest axons. We show how impractical this metric is for comparing different distributions. Overall, axon diameters cannot be quantified by diffusion MRI in any relevant way.

## 1 Introduction

2 In-vivo estimation of axon diameters has been an important goal of many researchers  
3 since the inception of diffusion MRI. As the diameter of a myelinated axon is one  
4 of the main determiner of its signal transmission velocity [24, 13], the availability of  
5 this structural information would greatly facilitate description and functional mod-  
6 eling of the brain communication pathways on an individual basis [26]. Detailed  
7 knowledge of tract specific axonal diameters would provide insight into detailed and  
8 mechanistic relationships between brain structure and important aspects of brain  
9 function, including development and learning. The capacity of dMRI to nonin-  
10 vasively probe cellular and axonal boundaries at the micrometer level seemed a  
11 promising method to pursue this aim.

12 The impact of restricted incoherent motion of water molecules on diffusion weighted  
13 NMR signals has already been described in the early days of MR spectroscopy  
14 [20, 29]. However, these models only describe the diffusion process happening in  
15 the perpendicular cross-section of the axon. Using them to approximate axonal  
16 diameters requires prior knowledge of the tissue orientations, an equal diameter  
17 of all axons in the probed volume, as well as the absence of extra-axonal signals.  
18 A common strategy to bring it to the in-vivo 3D acquisition setting has been to  
19 combine one or many cylindrical compartments, describing the intra-axonal diffu-  
20 sion, with additional compartments describing the extra-axonal Gaussian diffusion  
21 process [4, 5, 2, 10].

22 Despite the tremendous overestimation of axonal diameters arising from the use  
23 of multi compartment models [15] compared to electron microscopy ground truth  
24 [1, 18], these models are still seen as promising by a part of the community. This  
25 dilemma can be attributed to the fact that the relative *trend* of fitted diameters was  
26 argued to be somewhat plausible across the different parts of the corpus callosum  
27 [15] and that multi-compartment models in dMRI are difficult to fit reliably as they  
28 are essentially weighted sums of exponential functions.

29 Recent work highlighted an unavoidable sensitivity issue for detecting axon di-  
30 ameters of realistic size in the human brain, even with the latest high-end MRI  
31 systems [21]. It proposes an “axon diameter limit” ( $d_{\min}$ ) which corresponds to the  
32 smallest diameter that can be differentiated from a stick of diameter zero for given  
33 sequence parameters under ideal conditions. This  $d_{\min}$  is computed from the most  
34 generous setting and is therefore a lower bound on the unbiased smallest diameter  
35 detectable for data deviating from the idealized case of diffusion signal arising only  
36 from parallel cylinders of equal diameter. The diameter limit suggests that previous  
37 “trends” in the estimated diameters are not supported by the measured data. In-  
38 deed, not only is the expected signal decay for restricted diffusion in realistic human  
39 axons size very small, it is also insensitive to changes in the gradient spacing ( $\Delta$ ),  
40 which is typically the parameter been varied when the “small-big-small diameter  
41 trend” of the corpus callosum is observed. The large signal decay observed could  
42 be caused by noise, errors in the compartment separation or by other types of time-  
43 dependent diffusion such as diffusion signal from the extra-axonal compartment,  
44 which is sensitive to  $\Delta$ .

45 In this work, we employ extensive simulations of restricted diffusion MRI mea-  
46 surements under optimal conditions to concretely showcase the limitations of axon  
47 diameter mapping. We first show the sensitivity of MR signals to axon diameters.  
48 Secondly, we show the axon diameter limit in action in the case of fitting a single  
49 diameter. We then show the unresolvability of extending from single diameters to  
50 estimations of distributions of axonal diameters. Finally, we highlight the difficulty  
51 of interpreting a single diameter fitted over a distribution (so-called effective di-  
52 ameter [8, 30]), even with a complete understanding of the averaging mechanisms

53 projecting the distribution on this single value.

## 54 2 Methods

### 55 2.1 Relevant parameters

56 Throughout this work, we used numerical simulations to showcase the sensitivity  
57 of dMRI to axon diameters. It is therefore crucial to use realistic values for the  
58 various physical parameters. We describe each parameter, their realistic ranges,  
59 and our default choices. Particularly, we are concerned with the order of magnitude  
60 of the quantities and their scaling behavior (see eq. 3). For completion, we provide  
61 scripts to recompute any quantity, figure or experiment, for any choice of parameters  
62 (<https://github.com/mpaquette/axDiamFig>).

63 *Axon (cylinder) diameter  $d$* : The smaller the diameter, the smaller is the maxi-  
64 mal displacement of the water molecules, as we assumes impermeable axonal walls.  
65 This restricted water diffusion perpendicular to the axon will induced a small signal  
66 change proportional to the mean squared displacement inside the circular cross-  
67 section. Prior results from histological assessments show that human axons in the  
68 white matter of the brain have diameters in the order of  $1 \mu\text{m}$  [1, 18]. Typical distri-  
69 butions of diameters tend to peak around  $0.5\text{-}1.0 \mu\text{m}$  with maximum axon diameters  
70 around  $2.5\text{-}5 \mu\text{m}$  (see fig 4). Informally, the minimum sensitivity required to properly  
71 qualify such distributions has to be smaller than the peak of the distribution.

72 *Unrestricted diffusivity of the medium  $D_0$* : The lower the diffusivity is, the more  
73 time it takes for the diffusion process to saturate inside of the restricted compart-  
74 ment. The literature reports diffusivity values between  $1.5 \mu\text{m}^2/\text{ms}$  and  $2.7 \mu\text{m}^2/\text{ms}$   
75 for the in-vivo intra-axonal water compartment [31, 12]. In the case of post-mortem  
76 measurements, both the reduced tissue temperature and the fixation process reduce  
77 the tissue diffusivity [23]. Reported values for post-mortem diffusivities are around  
78  $1/3 - 1/4$  of that of in-vivo [14]. In our simulations we assume the following diffu-  
79 sivities:  $D_{0,\text{in-vivo}} = 2 \mu\text{m}^2/\text{ms}$  ( $2 \times 10^{-9} \text{ m}^2/\text{s}$ ), and  $D_{0,\text{post-mortem}} = 0.66 \mu\text{m}^2/\text{ms}$   
80 ( $0.66 \times 10^{-9} \text{ m}^2/\text{s}$ ).

81 *Diffusion gradient magnitude  $G$* : The strength of diffusion gradient hardware varies  
82 among the different types of MRI scanners. Typical clinical scanners tend to have  
83 weaker gradients ( $G_{\text{max}} = 40 \text{ mT/m}$ ), while gradient coils in preclinical small-bore  
84 scanners can produce magnetic field gradients as strong as  $1500 \text{ mT/m}$ . For human  
85 in-vivo measurements, the Siemens Connectom MRI scanner (Siemens Healthineers,  
86 Erlangen, Germany) is the system which produces by far the strongest diffusion  
87 gradients ( $G_{\text{max}} = 300 \text{ mT/m}$ ). In our simulations we use  $G = 300 \text{ mT/m}$ , as one of  
88 the goals associated with the development of this specific MRI system was to enable  
89 in-vivo axon diameter estimation.

90 *Diffusion gradient duration  $\delta$* : In the relevant regimes for human axon diameter es-

11 timation, the duration of the diffusion gradient pulse  $\delta$  is the parameter probing the  
12 time-dependent diffusivity of restricted diffusion. Indeed, with a shortest achiev-  
13 able gradient duration around 5 ms on a human MRI system, we are well into the  
14 regime where the gradient duration is comparable with the saturation time of the  
15 restricted compartment. In this regime, longer gradient pulses increase sensitivity  
16 (see sec. A.1). We limit the simulations to  $\delta_{\max} = 40$  ms as longer pulses are im-  
17 practical, as they increase the echo times of the acquisition, resulting in additional  
18 signal losses.

19 *Diffusion gradient separation  $\Delta$* : In the relevant regimes for human axon diameter  
20 estimation, the diffusion process is already saturated during the gradient application  
21 and varying the separation of the diffusion gradient pulses  $\Delta$  provides no extra  
22 sensitivity to restricted diffusion (see sec. A.1 and fig. 7). Therefore, to maximize  
23 signal, we use  $\Delta = \delta$ . In practice, varying  $\Delta$  *could* still be necessary for multi-  
24 compartment models where it is necessary to disentangle intra- and extra-axonal  
25 signal contributions.

26 *Signal to noise ratio SNR*: Ultimately, the SNR is the key parameter upon which  
27 “sensitivity” is defined. Throughout the simulations represented in this study, we  
28 corrupt signals with Gaussian noise (for simplicity and to produce a best case sce-  
29 nario), *i.e.*  $S_{\text{noisy}} = S_{\text{noiseless}} + \epsilon$  where  $\epsilon \sim \mathcal{N}(0, \sigma^2)$ . Since we only look at idealized  
30 diffusion effects, our signals have value of 1 at the b0 (no diffusion gradient applied),  
31 and therefore the SNR is defined as  $\text{SNR} = \sigma^{-1}$ . For comparison, the SNR of the  
32 b0 in the corpus callosum for a single in-vivo volume on the Connectom system  
33 with echo time of 70 ms, repetition time 7500 ms and resolution 1.8 mm isotropic  
34 is around 20. We showcase results for  $\text{SNR} = 30$  and some results for  $\text{SNR} = 300$ ,  
35 which correspond to 100 averages of a high quality Connectom acquisition, or pa-  
36 rameter estimations. Some diameter estimation approaches use aggregated fitting  
37 strategies such as ROI averaging or averaging along a tractography streamline path  
38 [11, 7, 6, 3] to increase the nominal SNR. Obviously, these aggregated strategies  
39 make strong assumptions on tissue composition and orientation homogeneity in a  
40 region or along the entire pathway. It is unclear if the SNR gains of such strate-  
41 gies outweigh the biases from neighboring voxel tissue inhomogeneity and averaging  
42 errors as these methods still suffer from diameter overestimation [6].

## 123 **2.2 dMRI signal sensitivity to diameter**

124 Diffusion MRI contrast is related to the bulk displacement of the water molecules  
125 during the diffusion encoding, which causes the measured signal decay. Inside re-  
126 stricted compartments such as the cross-section of a cylinder, the maximal displace-  
127 ment is capped by the boundary, potentially producing much smaller signal decays  
128 than produced by free diffusion. These restricted diffusion processes can be classified  
129 into different time regimes. On short time scales, the bulk of water molecules has

130 not yet interacted with the boundary, and therefore behaves as in free diffusion. In  
 131 the long time regime, most molecules have significantly interacted with the bound-  
 132 ary and their position at any given time doesn't correlate with their initial position  
 133 inside the cross section of the axon; the signal as reach maximal decay.

134 The general signal decay formula for a cylinder for a Pulsed Gradient Spin Echo  
 135 (PGSE) diffusion sequence [27] was first described by Neuman [20] and then ex-  
 136 tended by Van Gelderen [29] to account for cases where  $\Delta \neq \delta$  (eq. 1). For the  
 137 parameter ranges described in sec. 2.1, the Neuman long time limit (eq. 2) produce  
 138 almost indistinguishable results. In this work, we use eq. 1 truncated to 50 terms to  
 139 generate and fit signals arising from restricted diffusion.

$$\ln(E) = -2\gamma^2 G^2 \sum_{m=1}^{\infty} \left[ \frac{2D_0\alpha_m^2\delta - 2 + 2e^{-D_0\alpha_m^2\delta}}{D_0^2\alpha_m^6 \left(\left(\frac{d}{2}\right)^2\alpha_m^2 - 1\right)} + \frac{2e^{-D_0\alpha_m^2\Delta} - e^{-D_0\alpha_m^2(\Delta-\delta)} - e^{-D_0\alpha_m^2(\Delta+\delta)}}{D_0^2\alpha_m^6 \left(\left(\frac{d}{2}\right)^2\alpha_m^2 - 1\right)} \right] \quad (1)$$

140 where  $E$  is the normalized diffusion signal,  $\gamma$  is the proton gyromagnetic ratio,  $G$  is  
 141 the diffusion gradient amplitude,  $D_0$  is the unrestricted diffusivity in the cylinder,  
 142  $\Delta$  is the diffusion gradient separation,  $\delta$  is the diffusion gradient duration,  $d$  is the  
 143 diameter of the cylinder,  $J'(\cdot)$  is the derivative of the Bessel function of the first  
 144 kind and  $\alpha_m$  is the  $m^{\text{th}}$  root of the equation  $J'_1\left(\alpha \cdot \frac{d}{2}\right) = 0$ .

$$E = \exp\left(-\frac{7}{1536} \frac{\gamma^2 G^2}{D_0} d^4 \left(2\delta - \frac{99}{448} \frac{d^2}{D_0}\right)\right) \quad (2)$$

145 For realistic acquisition and biological relevant parameter values (see sec 2.1),  
 146 the diffusion process falls into the long time regime and the expected signal decays  
 147 is small compared to noise amplitude at typical SNR. Using eq. 1, we simulated the  
 148 expected MR signal decay for a multitude of combinations and we report the **decay**  
 149 **percentage** values in Table 1. To cover a wide range of biological, experimental  
 150 and instrumental parameters, we simulated restricted diffusion MRI signals using  
 151 (i) both in-vivo and post-mortem diffusivities, (ii) clinical gradient systems and  
 152 high-end Connectom gradients, and (iii) small to large human axons diameter.

153 Our simulations indicated that dMRI is not very sensitive to the axonal diam-  
 154 eter in realistic situations. For example, using optimal in-vivo setting (Connectom  
 155 strength gradients, very long diffusion pulse and in-vivo diffusivity) for an axon di-  
 156 ameter of 1 micrometer the process only produces a “contrast” of 0.12% signal decay  
 157 which is equal to one standard deviation of Gaussian noise with  $SNR \approx 833$ . To be  
 158 able to statistically identify this signal decay, we would typically need a decay to be  
 159 at least bigger than  $\sim 2$  standard deviation of the noise, depending on the choice  
 160 of the significance level. To reach such a low noise level would require  $SNR \approx 1666$ .

161 Hence, for realistic SNRs, small diameters cannot be differentiated from the noise  
 162 level in the image.

| Acquisition parameters |            | In-vivo ( $D_0 = 2.0 \mu\text{m}^2/\text{ms}$ )      |                       |                       |
|------------------------|------------|------------------------------------------------------|-----------------------|-----------------------|
| $\delta = \Delta$ (ms) | $G$ (mT/m) | $d = 0.5 \mu\text{m}$                                | $d = 1.0 \mu\text{m}$ | $d = 2.0 \mu\text{m}$ |
| 10                     | 40         | $3.2 \times 10^{-5}$                                 | $5.2 \times 10^{-4}$  | $8.1 \times 10^{-3}$  |
| 40                     | 40         | $1.3 \times 10^{-4}$                                 | $2.1 \times 10^{-3}$  | $3.3 \times 10^{-2}$  |
| 10                     | 300        | $1.8 \times 10^{-3}$                                 | $2.9 \times 10^{-2}$  | $4.6 \times 10^{-1}$  |
| 40                     | 300        | $7.3 \times 10^{-3}$                                 | $1.2 \times 10^{-1}$  | 1.8                   |
| Acquisition parameters |            | Post-mortem ( $D_0 = 0.66 \mu\text{m}^2/\text{ms}$ ) |                       |                       |
| $\delta = \Delta$ (ms) | $G$ (mT/m) | $d = 0.5 \mu\text{m}$                                | $d = 1.0 \mu\text{m}$ | $d = 2.0 \mu\text{m}$ |
| 10                     | 40         | $9.8 \times 10^{-5}$                                 | $1.6 \times 10^{-3}$  | $2.4 \times 10^{-2}$  |
| 40                     | 40         | $3.9 \times 10^{-4}$                                 | $6.3 \times 10^{-3}$  | $9.9 \times 10^{-2}$  |
| 10                     | 300        | $5.5 \times 10^{-3}$                                 | $8.7 \times 10^{-2}$  | 1.3                   |
| 40                     | 300        | $2.2 \times 10^{-2}$                                 | $3.5 \times 10^{-1}$  | 5.4                   |

Table 1: MR signal **decay** (in percent) for various diffusivities, acquisition parameters and axon diameters. We note that if we have  $\text{SNR} = 30$ , a noise realization of one standard deviation has a magnitude 3.3% signal decay. This showcases the difficulty of detecting and differentiating the signal decay caused by different diameter. For the post-mortem case, using the somewhat big  $d = 1 \mu\text{m}$  and strong Connectom-like acquisition ( $G = 300 \text{ mT/m}$ ), we are expecting a signal decay of 0.35%. To be able to statistically identify this signal decay, we would typically need a decay to be at least bigger than  $\sim 2$  standard deviation of the noise (depending on choice of significance level), which would require  $\text{SNR} \approx 570$ .

### 163 2.3 Axon diameter limit

164 To formalize the notion of sensitivity into a workable form using signal decay and  
 165 SNR, Nilsson et al. [21] introduced the diameter resolution limit ( $d_{\min}$ ). It is defined  
 166 as the smallest diameter such that the MR signal decay can be statistically differen-  
 167 tiated from no decay (in the limiting case  $d \rightarrow 0$ ) for a given signal-to-noise ratio  
 168 (SNR) and choice of significance level for the Z-test ( $\alpha$ ). The decay limit is given  
 169 by  $\bar{\sigma} = Z_{1-\alpha}/\text{SNR}$ . We use eq. 3 to find  $d_{\min}$  corresponding to the decay limit. We  
 170 use  $\alpha = 0.05$  ( $Z_{1-0.05} = 1.645$ ) for the entirety of this work.

$$d_{\min} = \left( \frac{768}{7} \frac{\bar{\sigma} D_0}{\gamma^2 \delta G^2} \right)^{1/4} \quad (3)$$

171 Practically, the main implications of this framework are governed by the ex-  
 172 ponents of the individual parameters. We can see for instance that halving the  
 173 diameter limit requires 4-fold increase in gradient strength or 16-fold increase in



174 SNR ( $\sim 256$  repetitions averaged). Table 2 showcases some values of  $d_{\min}$  for in-  
 175 vivo and post-mortem diffusivities, a long gradient pulse, various gradient strengths  
 176 (clinical, Connectom, and small-bore preclinical) for various SNRs. We see that  
 177 even in the idealized case [21], we obtain  $d_{\min} = 2.56 \mu\text{m}$  for the in-vivo Connectom  
 178 case at realistic SNR, falling quite short of our minimum target of around  $1 \mu\text{m}$ .  
 179 At SNR = 164 ( $\sim 5$  times higher than baseline,  $\sim 25$  averages), we have  $1.77 \mu\text{m}$ .  
 180 In this example, we need tissue with low post-mortem diffusivity and ultra-strong  
 181 gradients of the strongest preclinical scanner ( $G = 1500 \text{ mT/m}$ ) to reach the initial  
 182 goal of  $d_{\min} \leq 1 \mu\text{m}$ , showcasing the practical limitations arising from the fourth  
 183 root scaling in eq. 3.

| Parameters                         |                        |          | SNR  |      |      |
|------------------------------------|------------------------|----------|------|------|------|
| $D_0$ ( $\mu\text{m}^2/\text{m}$ ) | $\delta = \Delta$ (ms) | G (mT/m) | 164  | 65.6 | 32.8 |
| 2.0                                | 40                     | 40       | 4.69 | 5.89 | 7.01 |
| 2.0                                | 40                     | 300      | 1.71 | 2.15 | 2.56 |
| 2.0                                | 40                     | 1500     | 0.77 | 0.96 | 1.14 |
| 0.66                               | 40                     | 40       | 3.55 | 4.47 | 5.31 |
| 0.66                               | 40                     | 300      | 1.30 | 1.63 | 1.94 |
| 0.66                               | 40                     | 1500     | 0.58 | 0.73 | 0.87 |

Table 2: Values of  $d_{\min}$  ( $\mu\text{m}$ ) (eq. 3) for various parameters at significance level  $\alpha = 0.05$  (*i.e.* signal decay stronger than 1.645 standard deviations of noise distribution). The selected SNRs (164, 65.6, 32.8) correspond to minimum detectable signal decays of 1%, 2.5% and 5%.

184 To visualise the impact of  $d_{\min}$ , we plot the spread of recovered diameters in fig. 1.  
 185 For each diameter between  $0.1 \mu\text{m}$  and  $5 \mu\text{m}$ , we generated 10000 noisy restricted  
 186 signals and added Gaussian noise with SNR 30 and 300. The signals are generated  
 187 for realistic in-vivo settings ( $D_0 = 2 \mu\text{m}^2/\text{ms}$ ) with a Connectom-like acquisition  
 188 (single “direction/average”,  $G = 300 \text{ mT/m}$ ,  $\delta = \Delta = 40 \text{ ms}$ ). The different SNRs  
 189 are scaled copies and we see that the mean recovered diameter is biased for diameters  
 190 smaller than  $d_{\min}$ . The bias occurs because the average detected diameters become  
 191 driven by the signal decay corresponding to one standard deviation of noise. Hence,  
 192 the result suffers not only from uncertainty, but also from systematic bias.

193 It is necessary to insist on what the definition of  $d_{\min}$  truly implies, because it is  
 194 often misunderstood as being the diameter above which fitting will be stable. The  
 195 formalism of this section is a way to calculate the smallest signal decay *difference*  
 196 which is statistically differentiable from 0. We can assess if the SNR and acquisition  
 197 parameters are enough to differentiate two arbitrary diameters, by verifying that  
 198 their produced signal decay difference is bigger than  $\bar{\sigma}$ . If we set one of those  
 199 diameters to 0 and we look for the smallest second diameter above the threshold,  
 200 we get  $d_{\min}$ . The minimum diameter only assures us that the distribution of a noisy

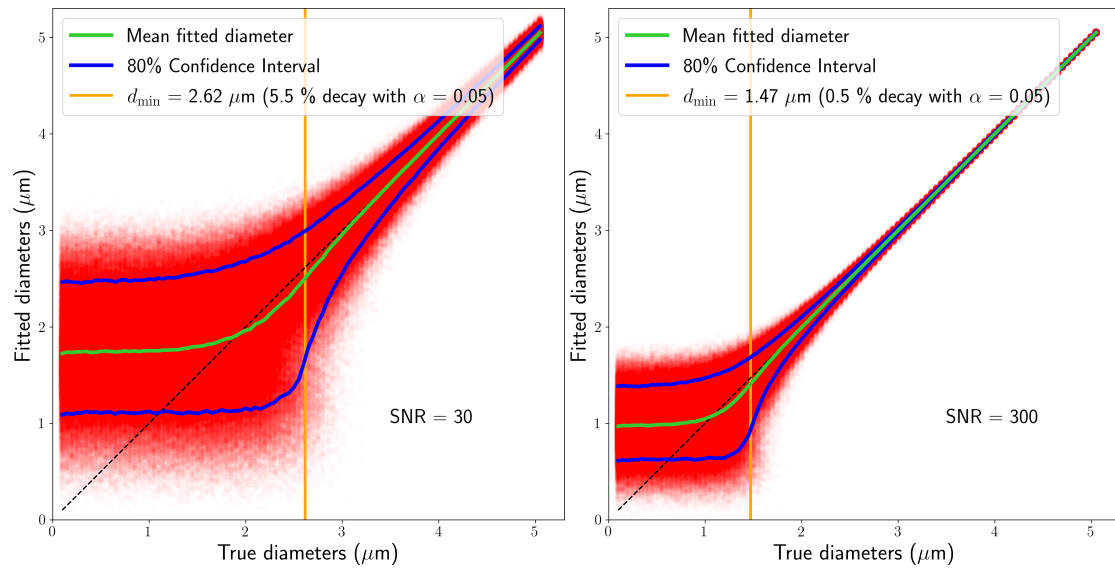

Figure 1: Scatter plot of fitted diameters with mean fitted diameter (green line) and 80% confidence interval (blue lines). For each diameter between  $0.1 \mu\text{m}$  and  $5 \mu\text{m}$ , we generated 10000 noisy restricted signals using eq. 3 and Gaussian noise of SNR 30 (left) and 300 (right). The signals are generated for realistic in-vivo setting ( $D_0 = 2 \mu\text{m}^2/\text{ms}$ ) with a Connectom-like acquisition (single “direction”,  $G = 300 \text{ mT/m}$ ,  $\delta = \Delta = 40 \text{ ms}$ ). The orange line corresponds to  $d_{\min}$  using the framework by [21].



201 signal decay around a true signal decay from a diameter bigger than  $d_{\min}$  doesn't  
202 “overlap significantly” with a signal decay of 0 (*i.e.* less than  $\alpha$  of the distribution  
203 is below 0).

## 204 2.4 Axon diameter distributions

205 In the previous sections, we focused on the sensitivity of dMRI for axon populations  
206 of a single diameter within a voxel. However, the white matter is composed of axons  
207 with multiple diameters spanning a large range [1, 18]. Therefore, it is sensible to fit  
208 a full distribution of diameters to the measured signal. This strategy can be imple-  
209 mented in multiple ways, such as enforcing a parameterized distribution family such  
210 as a gamma distribution over the relative axon counts, fitting volume fractions for  
211 a binned discretized distribution or by fitting multiple cylinder compartments with  
212 diameters as a free parameter. Intuitively, moving from single diameter estimations  
213 to any type of distribution will increase the  $d_{\min}$ , because adding additional degrees  
214 of freedom to a model increases the variance of the fitted parameters [16]. However,  
215 the fitting of axonal diameter distributions to dMRI signals is plagued by more than  
216 a simple increase to the related  $d_{\min}$ .

217 In this chapter we show that even the simplest model with multiple diameters has in-  
218 finitely many completely different solutions for realistic parameters (sec. 2.1). These  
219 simulations suggest that any “trend” of different diameters seen in images using such  
220 models is not supported by theory and is likely driven by either the regularization  
221 terms in the fit or by an effect unrelated to diameter, like noise, errors in the com-  
222 partment separation or by other types of time-dependent diffusion such as a diffusion  
223 signal from the extra-axonal compartment.

224 When we describe distributions of axon diameters,  $P_{\text{axon}}(d)$ , we refer to distri-  
225 butions over the number (*axon count*) of axons for each diameter inside a voxel.  
226 Under the assumption that axons of different diameter have the same proton den-  
227 sity, the *spin count* distribution becomes a cylinder volume-weighting of the *axon*  
228 *count* distribution,  $P_{\text{spin}}(d) = P_{\text{axon}}(d) \frac{\text{Vol}(d)}{\int \text{Vol}(d') dd'}$ . Since the different axons are im-  
229 plicitly assumed to be of the same length inside the voxel, the volume-weighting  
230 becomes a cross-section area-weighting ( $P_{\text{spin}}(d) = P_{\text{axon}}(d) \frac{d^2}{\int d'^2 dd'}$ ). The normalized  
231 spin counts are also often referred to as the **volume fractions** of each axon diame-  
232 ter, representing the relative volume of water inside the axons of a given diameter.  
233 When the water molecules inside the axons of different diameters have the same  
234 magnetic properties (*i.e.* identical  $T_2$ ,  $T_1$ , etc), the **signal fractions** are equivalent  
235 to the normalized *axon count* distribution. In this study, the conversion between  
236 volume and signal fraction only depends on cross-sectional area re-weighting.

237 In this experiment, we define the simplest distribution, a signal generated from  
238 a population of two parallel very big axon diameters in roughly equal proportion  
239 (with **signal fractions**: 30%  $d_1 = 4.5 \mu\text{m}$  and 70%  $d_2 = 3.5 \mu\text{m}$ , equivalent to

240 **volume fractions** of 41.5% and 58.5%) (fig. 2). We then plot the mean absolute  
241 difference between this (noiseless) signal and the signals generated for all the other  
242 possible configurations.

243 Similarly to how we only used a single “acquisition” (with maximally sensitive  
244 Connectom-like parameters) for the single parameters estimation in fig. 1, here we  
245 use Connectom-like acquisition parameters with three different gradient pulse du-  
246 rations to mimic the minimal requirements of uniquely fitting a three parameter  
247 model (two diameters and one signal fraction). The acquisition parameters were se-  
248 lected such that they provide sensitivity (long  $\delta$ ) and that the biggest individual  $d_{\min}$   
249 is comfortably below the smallest diameter in the ground truth ( $G = 300$  mT/m,  
250  $\Delta = 50$  ms,  $\delta = [30, 40, 50]$  ms). This two-cylinder model has a three dimensional  
251 space of possible parameter configurations: the first diameter, the second diameter  
252 and the signal fraction (of the first cylinder). In fig. 2, the parameter space is sliced in  
253 the signal fraction direction every 5% and shown as a sequence of 2D plots spanning  
254 all pairs of diameters. Regions of solid colors across all slices correspond to regions  
255 of the parameter space producing similar signal decay in this noiseless setting. For  
256 instance, the blue region corresponds to configurations producing a signal with less  
257 than 1% signal decay difference from the ground truth, making them indistinguish-  
258 able at regular SNR (for example, 1% signal decay correspond to  $\text{SNR} = 164$  for  
259 significance level  $\alpha = 0.05$ ). The blue region spans a surface across many unrelated  
260 pairs of diameters and signal fractions, showcasing the unresolvability of the sim-  
261 plistic two-diameter distribution under optimal conditions (ground truth perfectly  
262 matching the model and no other compartments to disentangle). The axon popu-  
263 lation diameters were chosen to be very big to highlight the fundamental problem  
264 of distribution fitting, for similar figures with smaller diameters, see Sec. A.4 where  
265 the effect is amplified.

266 In fig. 3, we repeat the previous experiment with gamma distributed axon diam-  
267 eter counts instead of the two-diameter distribution. We generated a signal using a  
268 population of cylinders where the *count* for each diameter follows a gamma distribu-  
269 tion (shape = 2.25 and scale = 0.4 with peak at  $0.5 \mu\text{m}$ ) using the same diffusivities  
270 and acquisition parameters as in fig. 2. We show the mean absolute difference be-  
271 tween our (noiseless) signal and signal generated from gamma distributions spanning  
272 shapes up to 9 and peak location up to  $3 \mu\text{m}$ . We note that a gamma distribution  
273  $\Gamma(k, \theta)$  of shape  $k$  and scale  $\theta$  has its peak at  $(k - 1)\theta$  for  $k \geq 1$  (0 otherwise).  
274 Regions of solid colors correspond to regions of the parameter space producing a  
275 similar signal decay in this noiseless setting. The colored dots in the central pa-  
276 rameter space correspond to the signal generated with the corresponding colored  
277 distribution (ground truth is red). As was the case with our previous two-cylinder  
278 example, we have a wide area of the parameter space generating roughly indistin-  
279 guishable signals. The four distributions pictured on the sides all produce essentially  
280 identical signals for a wide range of distribution shapes.

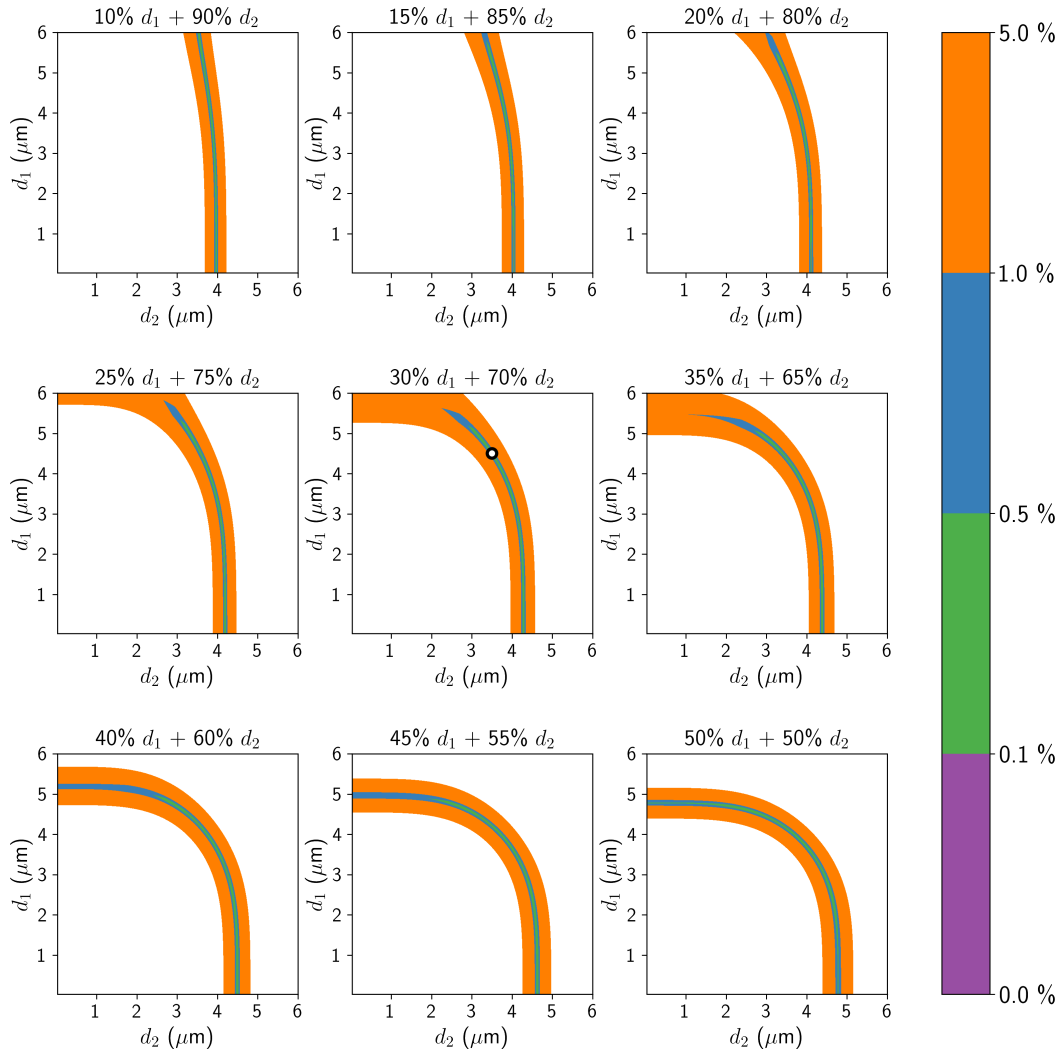

Figure 2: Example of the unresolvability of distribution fitting. The ground truth signal was generated from a combination of 2 parallel cylinders; 30% **signal fraction** with diameter  $d_1 = 4.5 \mu\text{m}$  and 70%  $d_2 = 3.5 \mu\text{m}$  (shown as white dot in the center plot) with in-vivo diffusivity ( $D_0 = 2 \mu\text{m}^2/\text{ms}$ ) and a Connectom-like acquisition with three gradient pulse durations ( $G = 300 \text{ mT/m}$ ,  $\Delta = 50 \text{ ms}$ ,  $\delta = [30, 40, 50] \text{ ms}$ ). The parameters were selected so that the smallest diameter was comfortably above “typical” diameter limit for  $\delta = 30$  (compared to the limit for  $\text{SNR} = 30$ , this experiment is noiseless). The 9 subplots represent all combinations of diameters between 0.1 and  $6 \mu\text{m}$ , sliced uniformly at signal fractions between 10% and 50%. The blue “path” correspond to parameter combinations yielding a signal less than 1% **signal decay** different than the noiseless ground truth. It forms a surface spanning most of the 3D parameter space, rendering any distribution fitting impossible for non-absurd SNR. Section A.4 showcase the same experiment for diameters closer to human axons.

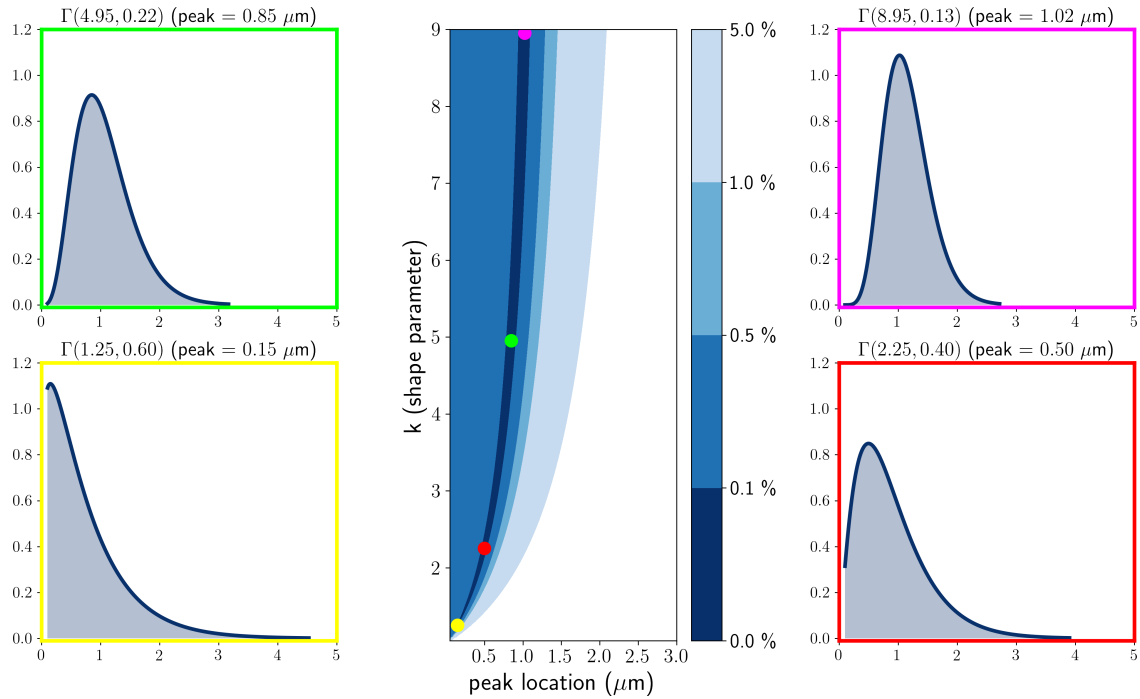

Figure 3: Example of the unresolvability of distribution fitting. The ground truth signal was generated using a gamma distribution of diameter count (shown as red dot in the center plot) with in-vivo diffusivity ( $D_0 = 2 \mu\text{m}^2/\text{ms}$ ) and a Connectom-like acquisition with three different gradient pulse durations ( $G = 300 \text{ mT/m}$ ,  $\Delta = 50 \text{ ms}$ ,  $\delta = [30, 40, 50] \text{ ms}$ ). The center plot represents all combinations of shape and peak location characterizing different gamma distributions. The dark blue “path” corresponds to parameter combinations yielding a signal less than 0.1% **signal decay** different than the noiseless ground truth. It forms a path spanning across most of the 2D parameter space, rendering distribution fitting unreliable for non-absurd SNR. The 4 side plots show examples of various gamma distributions from the center plot of wildly different shapes generating roughly indistinguishable signals.

## 281 2.5 Effective MR diameter

282 We have shown in the previous section (sec. 2.4) that it seems unfeasible to fit even  
283 the simplest distributions. Therefore, we might resort to fitting a single “effective”  
284 diameter. When fitting a single parameter over a quantity following a distribution,  
285 it is natural that this fitted value will take the form of a central tendency measure  
286 of that distribution (a “weighted average”).

287 In the case of MR axon diameters, there are two main effects providing the  
288 “weighting”. First, even though we are interested in the distribution of the *axon*  
289 *count*, the signal fractions are weighted by the *spin count*. Under the assumption  
290 of uniform intra-axonal proton density,  $T_2$ , same length cylinder for each diameter  
291 and no exchange, this manifest itself as a cross section area weighting, proportional  
292 to the 2<sup>nd</sup> power of the diameter. Secondly, the signal is sensitive to the 4<sup>th</sup> power  
293 of the diameter (as seen in eq. 2), adding up an extra heavy tail-weighting effect.  
294 Putting it all together, we can define the effective MR axon diameter  $d_{\text{eff}}$  over an  
295 arbitrary count distribution of density  $P(d)$  as a function of its moments (eq. 4)  
296 [8, 30].

$$d_{\text{eff}} = \sqrt[4]{\frac{\langle d^6 \rangle}{\langle d^2 \rangle}} \quad (4)$$

297 where  $\langle d^n \rangle = \int_d P(d)d^n$  is the  $n^{\text{th}}$  moment of the distribution of density  $P(d)$  (See  
298 sec A.2 for a simple proof-of-concept derivation). Fig. 4 shows a high match be-  
299 tween the effective axon diameter computed from fitting a single diameter over the  
300 signal simulated from the distribution ( $d_{\text{fit}}$  in red) and the effective axon diame-  
301 ter derived from direct computation using the moments of the distribution ( $d_{\text{eff}}$  in  
302 green) for an example of a human axon diameter distribution from the left and  
303 right uncinate/inferior occipitofrontal fascicle taken from [18]. Preliminary post-  
304 mortem results [30] indicated a good correspondence between  $d_{\text{eff}}$  estimated from  
305 microscopy and from dMRI in a rat brain using a complex imaging strategy which  
306 properly suppresses non-intra-axonal signals and effects from axon orientations and  
307 dispersion.

308 Evidence points toward  $d_{\text{eff}}$  from eq. 4 being an accurate description of the “av-  
309 eraging” process of a typical dMRI sequence over a distribution of axons in the  
310 presence of no other signal. However, it is important to keep in mind the limitations  
311 of  $d_{\text{eff}}$  as a metric. By the nature of dMRI, it is extremely weighted toward the tail of  
312 the distribution as shown in fig. 4. The two distributions are fairly similar in term of  
313 mean and peak location. However, the distribution of the left hemisphere (top plot)  
314 comprises an additional  $\sim 2.5\%$  of large axons, effectively doubling the  $d_{\text{eff}}$  compared  
315 to the distribution of the right hemisphere (bottom plot). In practice, when com-  
316 paring two  $d_{\text{eff}}$  values, it becomes impossible to distinguish between situations such  
317 as a small global shift toward larger axons or a few more big axons or very few extra

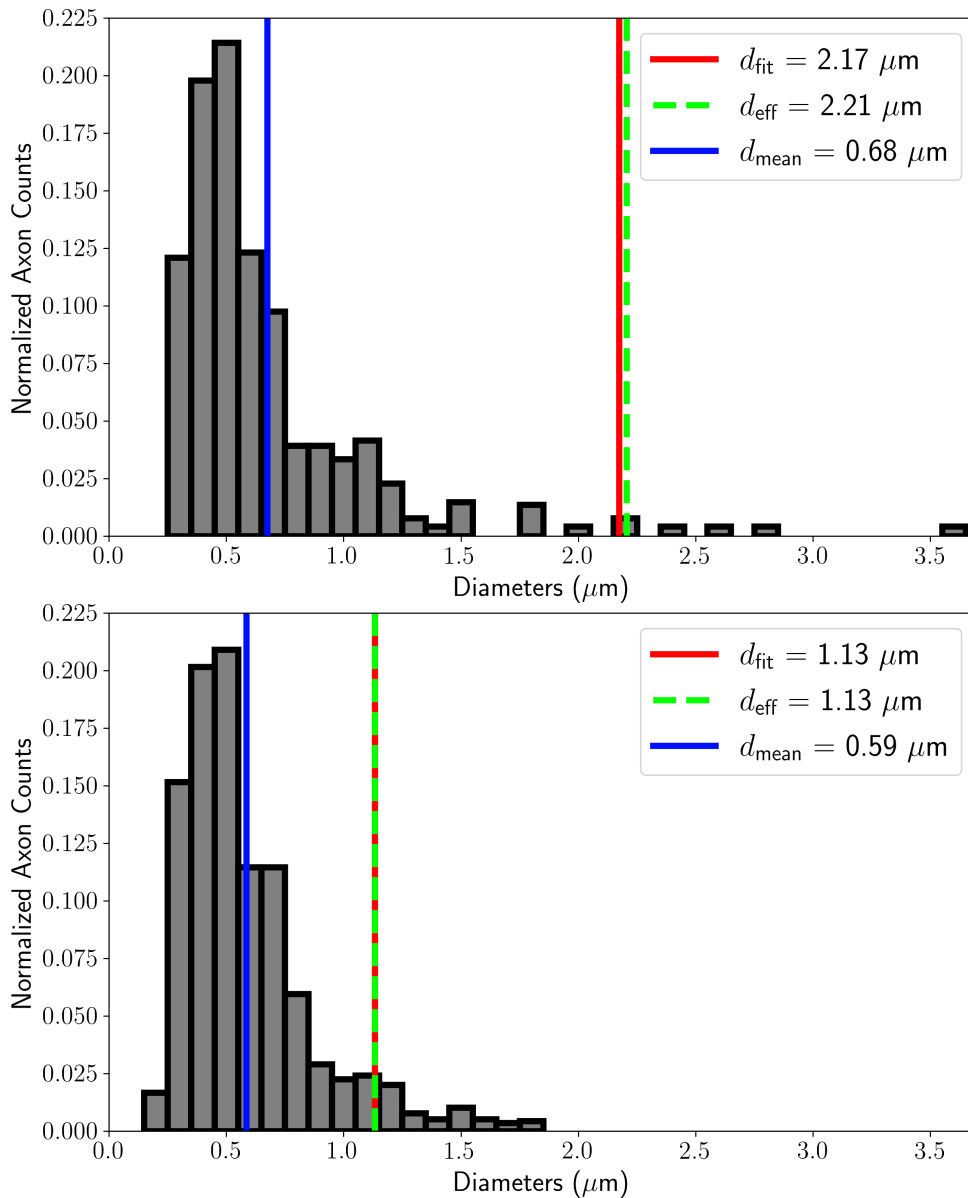

Figure 4: Human axon diameter normalized count distribution taken from Liewald et al.[18] (fig. 9, human brain 1, left and right hemisphere shown as top and bottom respectively). The peak diameter for both distributions is  $0.5 \mu\text{m}$  while the mean diameter  $d_{\text{mean}}$  is around  $0.6 \mu\text{m}$ . The bottom distribution maxes out below  $2 \mu\text{m}$  while the top distribution has a few extra axons in the  $2\text{--}4 \mu\text{m}$  range ( $\sim 2.5\%$  of axons by count). This small tail difference heavily affects the effective diameter  $d_{\text{eff}}$  (eq. 4) (doubles it in this case). The fitted MR diameter  $d_{\text{fit}}$  corresponds nicely with  $d_{\text{eff}}$  estimated from the moments of the distribution.

318 very large axons. This is to be expected when summarizing a complex distribution  
319 of two to three parameters with only a single metric. The interpretability of  $d_{\text{eff}}$  is  
320 additionally impaired by the heavy tail weighting of its calculation. Fig. 5 shows  
321 the same axonal diameter distribution taken from Liewald et al.[18] overlapped with  
322 densities of multiple families of distributions (gamma, normal, uniform, exponential)  
323 with parameters tailored to produce the same theoretical  $d_{\text{eff}}$ . The goal is to clearly  
324 highlight the large (infinite) number of strikingly different distribution shapes that  
325 can produce the same  $d_{\text{eff}}$ . The interpretation of  $d_{\text{eff}}$  in its current state will require  
326 very strong hypothesis on the type of distributions or differences that can exist,  
327 which is not available in general.

### 328 **3 Discussion and conclusion**

329 The goal of this work is to showcase the sensitivity limits and the unresolvability  
330 of MR axon diameter models from PGSE diffusion weighted sequences. In sec-  
331 tion 2.2 and 2.3, we have shown how simple computations using realistic in-vivo  
332 parameters even with high-end Connectom MR gradient systems generate only very  
333 small signal decay with extremely limited sensitivity to relevant axonal diameters.  
334 Even the more favorable combination of post-mortem tissue and ultra-strong pre-  
335 clinical gradients does not result in sufficient signal decay to measure realistic axon  
336 diameters using diffusion MRI. The problem can be reframed statistically by com-  
337 paring the signal decay to the noise level with a Z-test and defining a diameter  
338 limit. Computing  $d_{\text{min}}$  results in values that are very big compared to relevant axon  
339 diameters in the human brain. The effect of this limit was shown with an explicit  
340 simulation in fig. 1. In section 2.4, we have shown that fitting a distribution of  
341 diameters to the signal results in a multitude of widely different solutions even in  
342 the simplest settings. Finally, in section 2.5, we have shown how a distribution of di-  
343 ameters projects itself onto a single fitted diameter. While estimating  $d_{\text{eff}}$  from data  
344 seem feasible using advanced hardware and sequences [30], it remains a low dimen-  
345 sional and strongly tail-weighted projection of the distribution, making it ambiguous  
346 and insufficient for useful comparison.

347 We want to emphasize that every result in this work was computed utilizing  
348 idealized simulations that were arranged such that any presented limits correspond  
349 to a bound on the actual limit on real data. Hence, any claim of infeasibility  
350 of axon diameter measurement based on the employed simulations automatically  
351 translates to infeasibility of axon diameter measurements based on real data ac-  
352 quired with similar parameters. Our simulated data were generated (I) purely from  
353 intra-axonal signals and (II) perpendicular to the main orientation. In a multi-  
354 compartment model where the extra-axonal signal has to be fitted, (III) there will  
355 be residual fitting errors from the extra-axonal compartment contaminating the al-



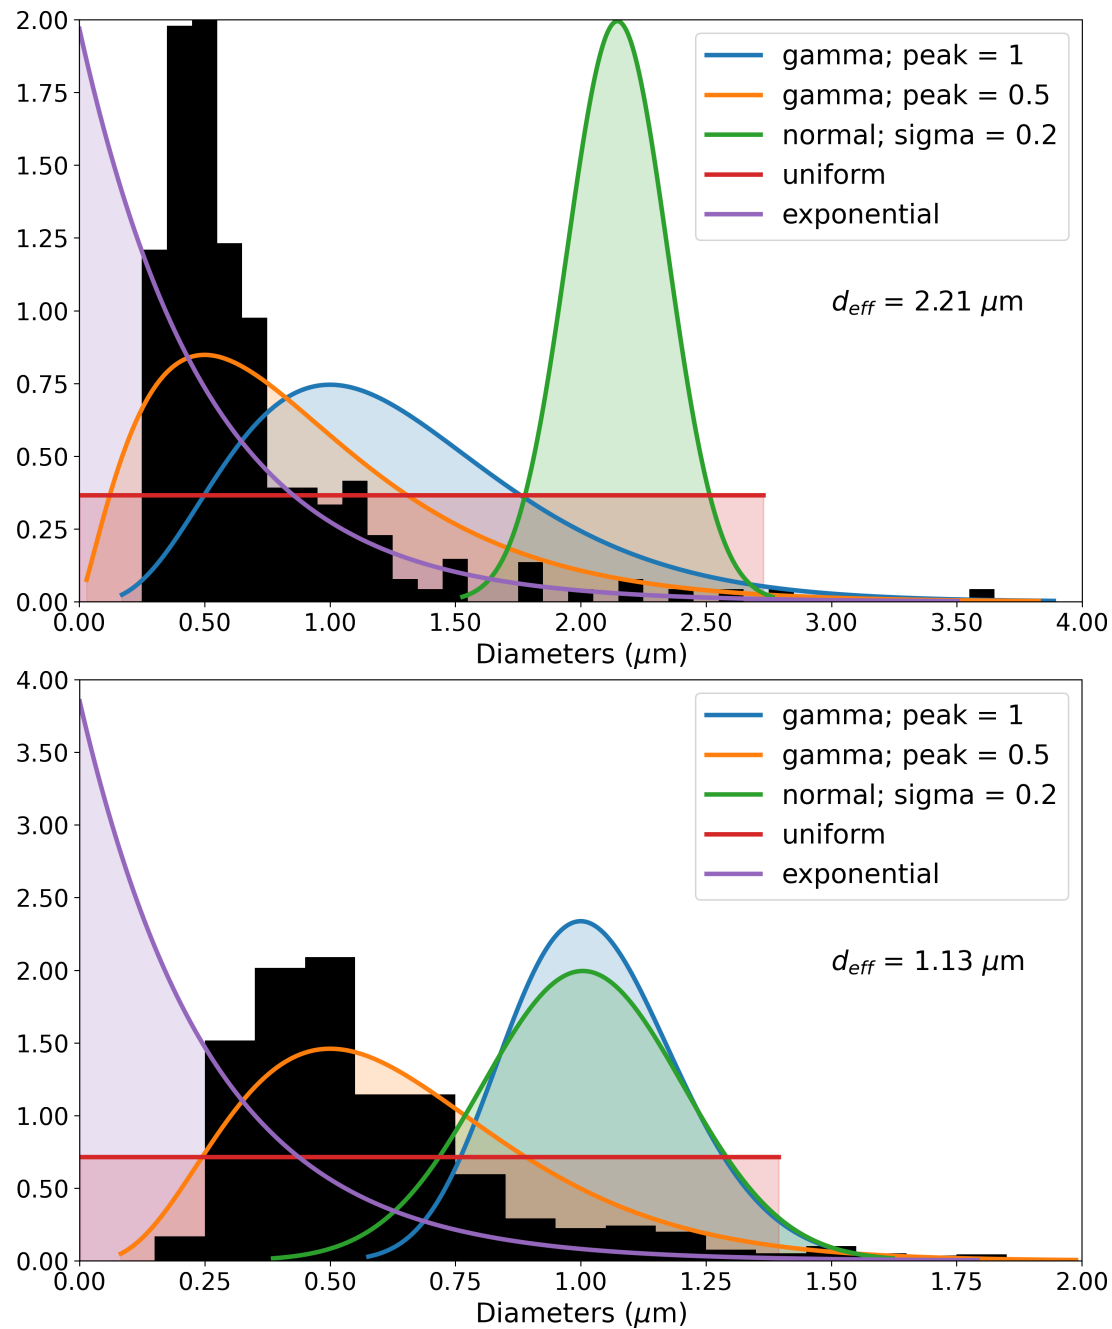

Figure 5: Different families of distributions tuned to produce the same  $d_{\text{eff}}$ . The target  $d_{\text{eff}}$  values were computed from the human axons diameter count distribution from Liewald et al.[18] (in black, the discrete counts were converted into a density for visualization). For both hemispheres, we used various families of distribution (restricted to be univariate) to show potential shape variance with identical  $d_{\text{eff}}$ .

356 ready tiny intra-axonal signal decay, increasing the effective  $d_{\min}$ . For example, a  
357 typical extra-axonal tensor compartment in the WM with a perpendicular diffusiv-  
358 ity of  $0.3 \mu\text{m}^2/\text{ms}$  produces a signal decay of  $(1 - \exp(-4.28 * 0.3)) \approx 71.6\%$  for  
359 acquisitions parameters  $\delta = \Delta = 10 \text{ ms}$  and  $G = 300 \text{ mT/m}$ . If only 1% of this  
360 signal decay (i.e. 0.716% total signal decay) is instead considered as restricted com-  
361 partment decay fitted with  $D_0 = 2 \mu\text{m}^2/\text{ms}$ , it would be equivalent to a cylinder  
362 with diameter  $2.2 \mu\text{m}$

363 In the simulations, we considered that the typical white matter SNR from an  
364 MR acquisition using Connectom gradients was driven only by intra-axonal signal.  
365 (IV) However, in reality the intra-axonal volume fraction comprises less than 50% of  
366 the total volume in dense parallel fiber regions such as the corpus callosum and less in  
367 deep white matter [9]. This discrepancy (at least) halves the measured intra-axonal  
368 signal decay, thereby additionally increasing the effective  $d_{\min}$ . (V) Moreover, uncer-  
369 tainties in the estimation of the fiber orientation will additionally bias the apparent  
370 diameter because the restricted diffusion model will be fitted to the elongated ellip-  
371 tical cross-section. (VI) Unaccounted orientation dispersion for multi-compartment  
372 models will make estimation essentially impossible as shown in Nilsson et al.[21].  
373 Considering all those sources of bias, it is clear that the already small signal decay  
374 caused by the restricted diffusion inside axons is essentially unattainable with such  
375 multi-compartment models.

376 An important message from eq 3 and tables 1-2 are the scaling powers of the  
377 parameters. They are such that the sensitivity problem cannot be fixed using  
378 more powerful gradient systems. Even extreme cases such as going from in-vivo  
379 Connectom-like ( $G = 300 \text{ mT/m}$ ) acquisitions at normal SNR, to post-mortem  
380 measurements with ultra-strong preclinical gradients ( $G = 1500 \text{ mT/m}$ ) and 5 times  
381 better SNR (25 averages) only decreases the  $d_{\min}$  from  $2.56$  to  $0.58 \mu\text{m}$  (around 4.4  
382 times better). This new value is barely enough to be sensitive to the peak of the  
383 diameter distribution in the best case. If we consider all the idealized assumptions  
384 from the diameter limit formula, it is likely not sufficient.

385 There are many misconceptions in the literature about the difficulty of going from  
386 single diameter fitting to multiple diameters or a distribution. The “intuition” that  
387 errors in the fitted distribution will be normally distributed around the true solution  
388 fails spectacularly, even in the absolute simplest case of a signal from two axonal  
389 compartments with big diameters and no source of possible confounds as seen in fig. 2  
390 and in section A.4. A commonly seen argument is to limit the distribution fit at some  
391  $d_{\min}$  best case value and claim that the resulting distribution must be valid because  
392 we are sensitive to these bigger diameters. Let’s ignore  $d_{\min}$  and simply focus on what  
393 it fundamentally attempts to do, put a limit on the minimal signal decay that can be  
394 statistically seen above the noise. To highlight this previous point, let’s look at fig. 2  
395 where configurations such as (35%  $5 \mu\text{m}$  + 65%  $3 \mu\text{m}$ ), (30%  $4.5 \mu\text{m}$  + 70%  $3.5 \mu\text{m}$ ),  
396 (100%  $4 \mu\text{m}$ ) and (45%  $0.1 \mu\text{m}$  + 55%  $5 \mu\text{m}$ ) produced signal with [0.1, 0.5]% signal

397 decay difference. Such a small decay requires  $\text{SNR} \in [330, 1650]$  at optimal in-vivo  
398 Connectom-like settings, which correspond to a  $d_{\min} \in [0.96, 1.44] \mu\text{m}$ , showing the  
399 disconnection between the limits of distribution fitting and direct  $d_{\min}$  computation.

400 With the complexity of real axonal diameter distributions and the apparent im-  
401 possibility of reliably fitting a distribution, working with the effective diameter  $d_{\text{eff}}$   
402 seems to be the most promising avenue, when combined with an advanced acquisi-  
403 tions strategy to negate the non-intra-axonal signal, such as [30]. However,  $d_{\text{eff}}$  is  
404 not a well behaved metric for comparisons between subjects or different brain areas.  
405 Before we can do such an analysis, we would potentially need to develop a new non-  
406 Stejskal-Tanner diffusion sequence producing a slightly different weighting of the  
407 distribution to allow some disentangling. In its current state,  $d_{\text{eff}}$  cannot differenti-  
408 ate fundamentally different situations such as a small diameter increase of all axons  
409 versus a large diameter increase from a small proportion of the axon population.

410 An interesting topic we did not mention so far is the time-dependence of the  
411 extra-axonal space diffusion [22, 8, 17, 25]. Previous attempts to model axonal di-  
412 ameters assumed that all the time-dependent diffusivity portions of the signal were  
413 due to intra-axonal restricted diffusion. Recent work has highlighted a mechanism  
414 by which the extra-axonal space can also produce signals with time-dependent dif-  
415 fusivity. Indeed, the spacing of the restricting barrier in the extra-axonal compart-  
416 ment tends to be larger than typical axon diameters at relevant time-scales. This  
417 has the effect of producing a larger signal decay than the intra-axonal restricted  
418 compartment for a given acquisition scheme and to produce a time-dependent dif-  
419 fusivity when varying  $\Delta$ . We briefly show in section A.3 how this extra-axonal  
420 time-dependence could contribute to the axon diameter overestimation seen in lit-  
421 erature.

422 An apparent oversimplification throughout this work concerns how SNR and  
423 number of samples are chosen. For example, in fig. 1, our 1D approach is equivalent  
424 to generating the signal for a single gradient direction perpendicular to the cylin-  
425 der. Similarly, we chose three directions for fig. 2 *i.e.* equal to the number of free  
426 parameters. If you had a real sample containing only identical parallel cylinders,  
427 you wouldn't have knowledge of the orientation and would sample hundreds of di-  
428 rections spread across multiple values of  $\delta$  and  $G$ . It is hard to define a single value  
429 representing the SNR gain going from one data point with perfect alignment and  
430 with maximal sensitivity to hundreds of data points with varying sensitivity, extra  
431 parameters to fit and etc. If we take instead 100 repetitions of the optimal measure-  
432 ment and ignore the unknown orientations, we get an upper bound of  $\sqrt{100} = 10$   
433 times better SNR which corresponds to a  $\sqrt[4]{10} = 1.78$  times smaller  $d_{\min}$ . A more  
434 realistic upper bound is to include the estimation of the direction as two extra free  
435 parameters and frame the data as  $\frac{100}{3}$  repetitions of three optimal measurements;  
436  $\sqrt{\frac{100}{3}} \approx 5.77$  times better SNR which corresponds to a  $\sqrt[4]{5.77} \approx 1.52$  times smaller  
437  $d_{\min}$ . This view becomes increasingly complex as we add more parameters and start

438 taking into account how different measurements have non-equal sensitivity to each  
439 of the estimated parameter. Since there is a 8<sup>th</sup> root scaling of  $d_{\min}$  versus addi-  
440 tional averaging (functional form of diameter versus signal decay is 4<sup>th</sup> power and  
441 SNR versus averages is 2<sup>nd</sup> power in the best case), we feel that results on minimal  
442 number of data points are sufficiently relevant.

443 In summary, our results show that the MR-based assessment of axonal diameters  
444 is methodologically infeasible. Our simulations under ideal conditions demonstrate  
445 that diffusion-weighted MRI with current and foreseeable future hardware is not  
446 capable of performing axonal diameter measurements in biologically relevant dimen-  
447 sions. The inability to measure axonal diameters is not a matter of the biophysical  
448 model choice but rather stems from the missing contrast of the intra-axonal tissue  
449 fraction. Under realistic, less ideal measurement conditions, the feasibility of such  
450 measurements is even further reduced. We show that frequently shown “known”  
451 variations of axonal diameter across structures such as the corpus callosum might  
452 also be explained with time dependent diffusion of the extra-axonal tissue frac-  
453 tion. Therefore, previous measurements and model fitting results rather represent a  
454 characterization of the extra-axonal space than a measure or representation of the  
455 axonal diameter. Our manuscript further investigates recent descriptions of axonal  
456 diameters using a projection on an “effective diameter”. Our simulations show this  
457 representation can be strongly biased by single axons and does not allow to draw  
458 any unambiguous conclusions about the actual distribution of diameters. Given  
459 the immense methodological difficulties of MR axonal diameter measurements, we  
460 suggest to include the time dependence of extra-axonal diffusion in the quantitative  
461 description of the microstructure of white matter in future studies. In connection  
462 with an independent measure of tissue myelination, this time dependency may pro-  
463 vide an indirect approach to estimate the outer axonal diameter. Multidimensional  
464 dMRI measurements [28] may help to describe the extra-axonal space due to a re-  
465 duced degeneracy of associated microstructural models. This may open a doorway  
466 to a quantitative study of brain microstructure using diffusion MRI.

## 467 **Acknowledgement**

468 MP is supported by a scholarship (PDF-502732-2017) from the Natural Sciences  
469 and Engineering Research Council of Canada (NSERC). MP and CE are supported  
470 by the Priority Program 2041 (SPP 2041) “Computational Connectomics” of the  
471 German Research Foundation (DFG).

## 472 A Appendices

### 473 A.1 $\Delta$ insensitivity to axon diameter

474 There is some misunderstanding in the literature concerning the impact of varying  
 475  $\Delta$  to probe axon diameter. Intuitively, the dMRI signal is created by the dephasing  
 476 of spins due to their displacement. For  $\Delta$  to play a role in the measured restricted  
 477 signal, we need to be in a short enough  $\delta$  time regime. In the long time regime, by  
 478 the end of the gradient application, most spins have interacted strongly with the  
 479 axonal wall and their positions are mostly de-correlated from their initial position;  
 480 the maximal signal decay has been reached and changing the gradient spacing  $\Delta$   
 481 will not change anything. In the range of relevant parameter values (see sec. 2.1),  
 482 it is simple to numerically show this phenomenon. Fig. 7 shows the signal decay  
 483 computed from eq. 1 for all physically plausible  $(\Delta, \delta)$  pairs in  $\Delta \in [10, 50]$  ms and  
 484  $\delta \in [10, 50]$  ms for various axon diameters for an in-vivo Connectom-like settings.  
 485 The respective signal decay depends strongly on the diameters, however, there is  
 486 no perceptible difference for different  $\Delta$  at the same  $\delta$ . The same results can be  
 487 achieved by Monte-Carlo spin diffusion simulation (see Fig. 6).

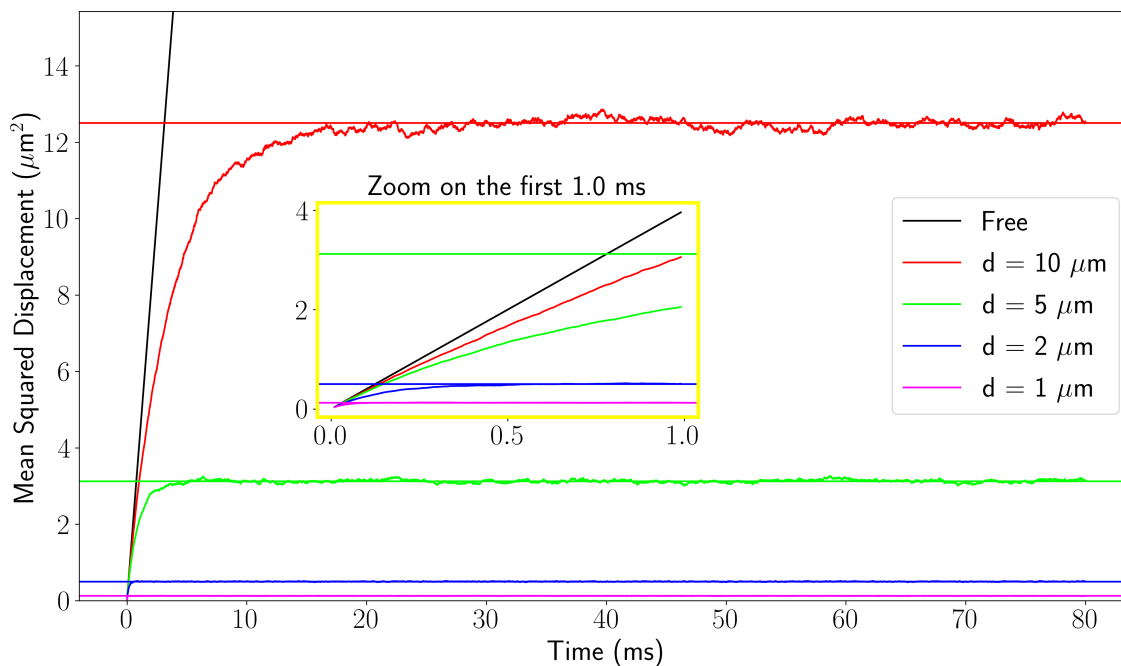

Figure 6: Mean squared displacement (MSD) for one direction from 2D Monte-Carlo simulation for free diffusion and restricted diffusion inside circles of different radius using  $D_0 = 2 \mu\text{m}^2/\text{ms}$ . The horizontal lines show the long time limit MSD for each diameter. The center plot is a zoom on the first millisecond where we see that even the relatively large  $2 \mu\text{m}$  diameter circle reaches long time regime quicker than any sufficiently strong diffusion gradient can be applied ( $\delta_{\min} \geq 5 \text{ ms}$ ).

488 Another way to demonstrate this result is to derive the rough form of the signal

489 equation from spin dephasing. We have applied gradient  $g$  and pulse width  $\delta$ . In  
 490 the long time regime, we have  $\delta \gg t_c$ ,  $t_c$  being the characteristic correlation time of  
 491 the cylinder ( $t_c \sim d^2/D_0$ ). We will first calculate the phase  $\phi_1$  accumulated by spins  
 492 within a time window of  $t_c$  (where the Gaussian phase approximation applies [20])  
 493 and then compute the total phase  $\phi$  accumulated as a sum of  $N \sim \delta/t_c$  uncorrelated  
 494 contributions. Within one short step, phase is accumulated linearly proportional to  
 495 the applied gradient and spin displacement,  $\phi_1 \sim gdt_c$ . We now compute the signal  
 496 using  $\ln(S) \sim -\phi^2 \sim -\phi_1^2\delta/t_c = -g^2d^2t_c\delta = -\frac{g^2d^2\delta}{D_0}$ . The recovered equation form  
 497 corresponds to the Neuman long-time limit up to a constant and is independent of  
 498  $\Delta$  and the initial position (it implicitly vanished by considering a displacement of  $d$   
 499 for a time-step of  $t_c$  in  $\phi_1$ ).

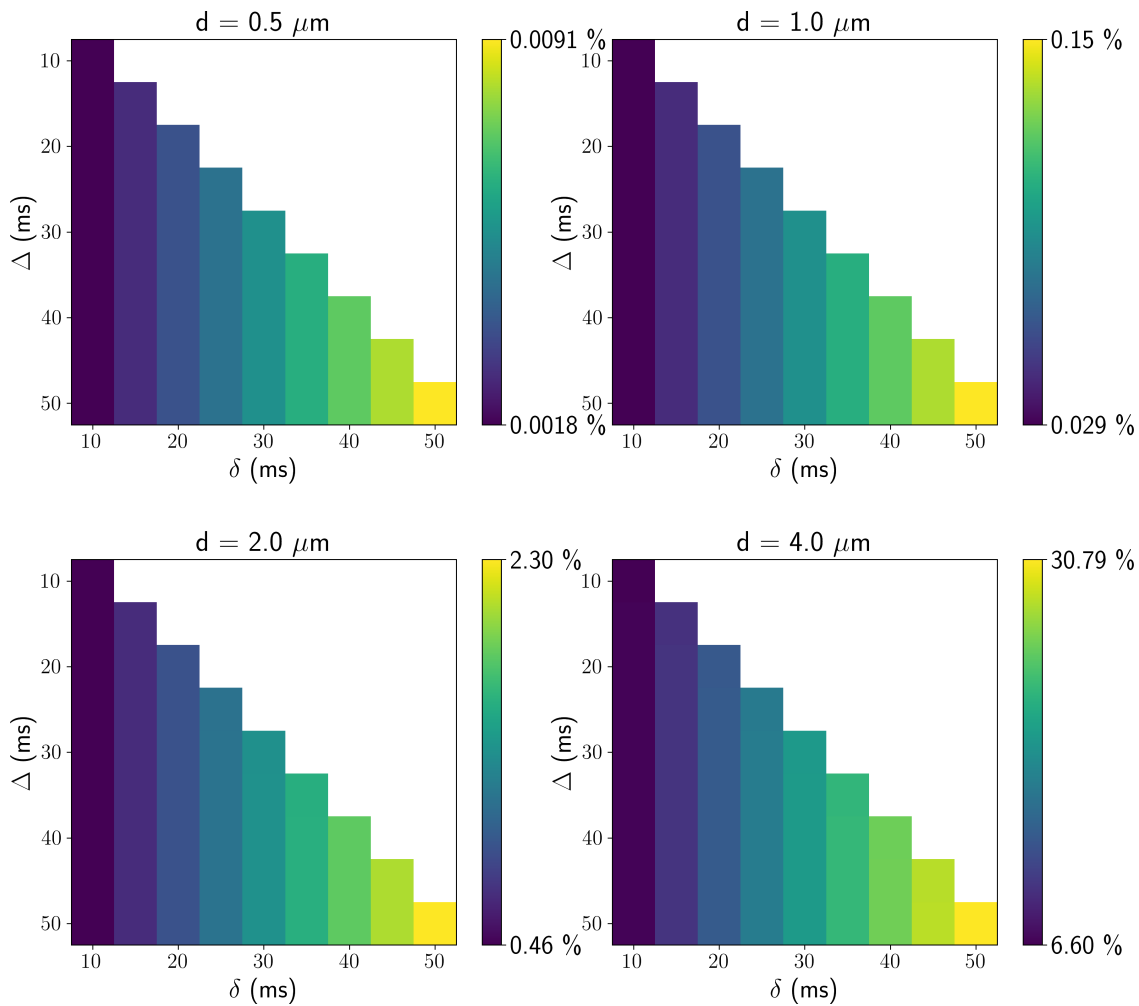

Figure 7: Noiseless MR signals from eq 1 for various  $(\Delta, \delta)$  and axon diameter ( $d$ ). The signals were simulated for  $G = 300$  mT/m and  $D_0 = 2.0 \mu\text{m}^2/\text{ms}$ . We note that different  $\Delta$  (y-axis) doesn't modify the signal in any appreciable way.

## 500 A.2 Effective diameter derivation

We give a simple derivation of the effective diameter. The normalized MR signal as a function of  $d$  with all other parameters fixed is

$$E(d) = \exp\left(-\frac{7}{768} \frac{\gamma^2 G^2 \delta}{D_0} d^4\right) \equiv \exp(Cd^4)$$

501 for some fixed constant  $C$ . We compute the volume fraction normalized signal  $E_P$  for  
 502 diameter **counts** following a distribution of density  $P(d)$ . We use the approximation  
 503  $E(d) \approx 1 + Cd^4$  from the truncated Taylor series of  $\exp(\cdot)$ .

$$\begin{aligned} E_P &= \int_d P(d) \frac{(\pi d^2)}{\int_{d'} P(d') (\pi d'^2) dd'} E(d) dd \\ &= \frac{\int_d P(d) (\pi d^2) E(d) dd}{\int_d P(d) (\pi d^2) dd} \\ &= \frac{\int_d P(d) (\pi d^2) (1 + Cd^4) dd}{\int_d P(d) (\pi d^2) dd} \\ &= \frac{\int_d P(d) (\pi d^2) dd}{\int_d P(d) (\pi d^2) dd} + \frac{\int_d P(d) (\pi d^2) Cd^4 dd}{\int_d P(d) (\pi d^2) dd} \\ &= 1 + C \cdot \frac{\int_d P(d) d^6 dd}{\int_d P(d) d^2 dd} \\ &= 1 + C \cdot \frac{\langle d^6 \rangle}{\langle d^2 \rangle} \\ &= 1 + C \cdot \left( \sqrt[4]{\frac{\langle d^6 \rangle}{\langle d^2 \rangle}} \right)^4 \\ &= E\left(\sqrt[4]{\frac{\langle d^6 \rangle}{\langle d^2 \rangle}}\right) = E(d_{\text{eff}}) \quad \blacksquare \end{aligned}$$

## 504 A.3 Extra-axonal time-dependent diffusivity

505 It has been shown that the extra-axonal compartment can exhibit time-dependent  
 506 diffusivity [22, 8, 17]. It arises from the disorder created by the irregular packing  
 507 of axons of varying diameters. The “disorder strength” is characterized by the  
 508 parameter  $A$  and has been empirically estimated in [8] to be  $A \approx 0.2(l_c^\perp)^2$  where  $l_c^\perp$   
 509 is the fiber packing correlation length at which diffusion is restricted in extra-axonal  
 510 space. Two models of perpendicular diffusivity as function of  $(\Delta, \delta)$  are described  
 511 in [17];  $D_\perp^{\text{intra}}(\Delta, \delta)$  assuming that all the time dependence in the diffusivity arises  
 512 from intra-axonal space,  $D_\perp^{\text{extra}}(\Delta, \delta)$  assuming that all the time dependence in the  
 513 diffusivity arises from the extra-axonal space.

$$D_\perp^{\text{intra}}(\Delta, \delta) \simeq f_{ex} D_\infty^{ex} + \frac{c}{\delta(\Delta - \delta/3)}, \quad c = \frac{7}{768} \frac{f_{in} d_{\text{eff}}^4}{D_0} \quad (5)$$



$$D_{\perp}^{\text{extra}}(\Delta, \delta) \simeq f_{ex} D_{\infty}^{ex} + c' \frac{\ln(\Delta/\delta) + \frac{3}{2}}{\Delta - \delta/3}, \quad c' = f_{ex} A \quad (6)$$

514 with extra-axonal volume fraction  $f_{ex}$ , intra-axonal volume fraction  $f_{in} = 1 - f_{ex}$ ,  
 515 long time ( $\Delta \rightarrow \infty$ ) extra-axonal diffusivity  $D_{\infty}^{ex}$ , bulk diffusivity  $D_0$  and disorder  
 516 strength parameter  $A$ .

517 Evidence on a few subjects suggest that the extra-axonal time-dependence dom-  
 518 inates the intra-axonal time-dependence [25, 17]. This was shown by fitting both  
 519 eq. 5 and 6 to data acquired with fixed  $\delta = 20$  ms and multiple  $\Delta \in [26, 100]$  ms  
 520 to comparable goodness-of-fit. The fitted parameters were then used to predict the  
 521 signal values of a second acquisition using  $\Delta = 75$  ms and multiple  $\delta \in [4, 45]$  ms,  
 522 where the extra-axonal model obtained good predictions and the intra-axonal model  
 523 failed. Since most axon diameter estimation methods assume static values for the  
 524 extra-axonal diffusivity, if the time-dependence in the signal is dominated by extra-  
 525 axonal effects, the estimated diameters will be large and mostly unrelated to the  
 526 effective diameter  $d_{\text{eff}}$ . To showcase this effect, we equated eq. 5 and 6 ( $D_{\perp}^{\text{intra}}(\Delta, \delta) =$   
 527  $D_{\perp}^{\text{extra}}(\Delta, \delta)$ ) and isolated  $d_{\text{eff}}$ . We used the typical value of  $D_0 = 2 \mu\text{m}^2/\text{ms}$  and  
 528 fixed  $D_{\infty}^{ex} = 0.5 \mu\text{m}^2/\text{ms}$  (fitted values in [17] inside  $[0.38, 0.6] \mu\text{m}^2/\text{ms}$ ). We use  
 529  $f_{ex} \in [0.25, 0.75]$  and  $A \in [0.25, 2]$ , giving us  $f_{ex}A \in [0.0625, 1.5]$  compared to the  
 530 reported values in [17] inside  $[0.24, 0.56]$ . We generated the “fake”  $d_{\text{eff}}$  for all phys-  
 531 ically plausible combinations of  $\Delta \in [5, 100]$  ms and  $\delta \in [5, 50]$  ms. We observe  
 532 effective diameter between  $2 \mu\text{m}$  and  $9.5 \mu\text{m}$ , with most diameters above  $6 \mu\text{m}$  in  
 533 the configurations ( $f_{ex} = 0.5$  and  $A = [0.5, 1]$ ) closest to results from [17].

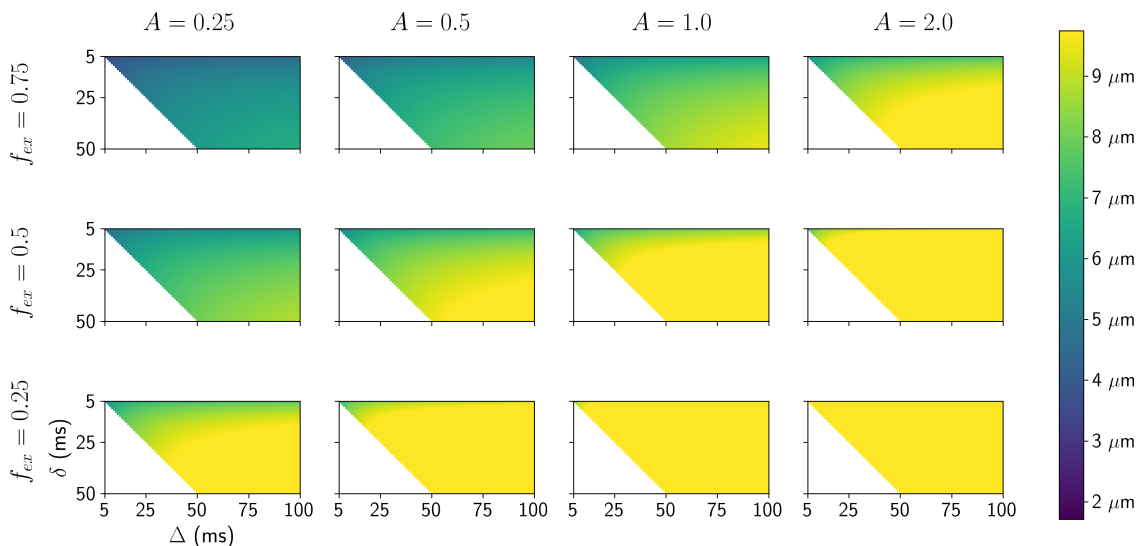

Figure 8: Signal generated using the extra-axonal time-dependence formula eq 6 and effective diameters fitted using eq 5.

534 The well-known “small-big-small diameter pattern” observed in the corpus cal-  
 535 losum with histology and “reproduced” with big overestimation by axon diameter

536 estimation methods ([2, 19, 15, 10]) can potentially be explained by this presented  
537 effect [25]. A brain area with a higher mean diameter is likely to also have an  
538 increased  $l_c^\perp$  for random circle packing; if the diameter distribution is uniformly  
539 shifted up, the packing keeps the same relative efficiency and the individual inter  
540 space grows, alternatively, if a few more big axons are present, it increases the di-  
541 ameter heterogeneity and the packing efficiency tend to go down, creating more  
542 extra-axonal space. In any case,  $f_{ex}A$  increases and the “fake”  $d_{\text{eff}}$  follows in the  
543 setting of fig. 8. However, the extra-axonal model parameters still contain some  
544 information about the *outer* diameter distribution, but it is complexly tangled with  
545 axon packing.

#### 546 A.4 Two-diameter distributions

547 We show more examples of fitting a two-diameter model with smaller, more realistic  
548 diameters. In fig. 2, we used a combination of enormous diameters (**signal frac-**  
549 **tion**, 30%  $d_1 = 4.5 \mu\text{m}$  and 70%  $d_2 = 3.5 \mu\text{m}$ ) to highlight the effect of having a  
550 distribution over the lack of sensitivity of the realistic state-of-the-art acquisition  
551 scheme. We now show results for (30%  $d_1 = 3.5 \mu\text{m}$  and 70%  $d_2 = 2.5 \mu\text{m}$ ) and  
552 (30%  $d_1 = 2.5 \mu\text{m}$  and 70%  $d_2 = 1.5 \mu\text{m}$ ), where the ambiguity over the diameters  
553 is amplified for the same sampling scheme.

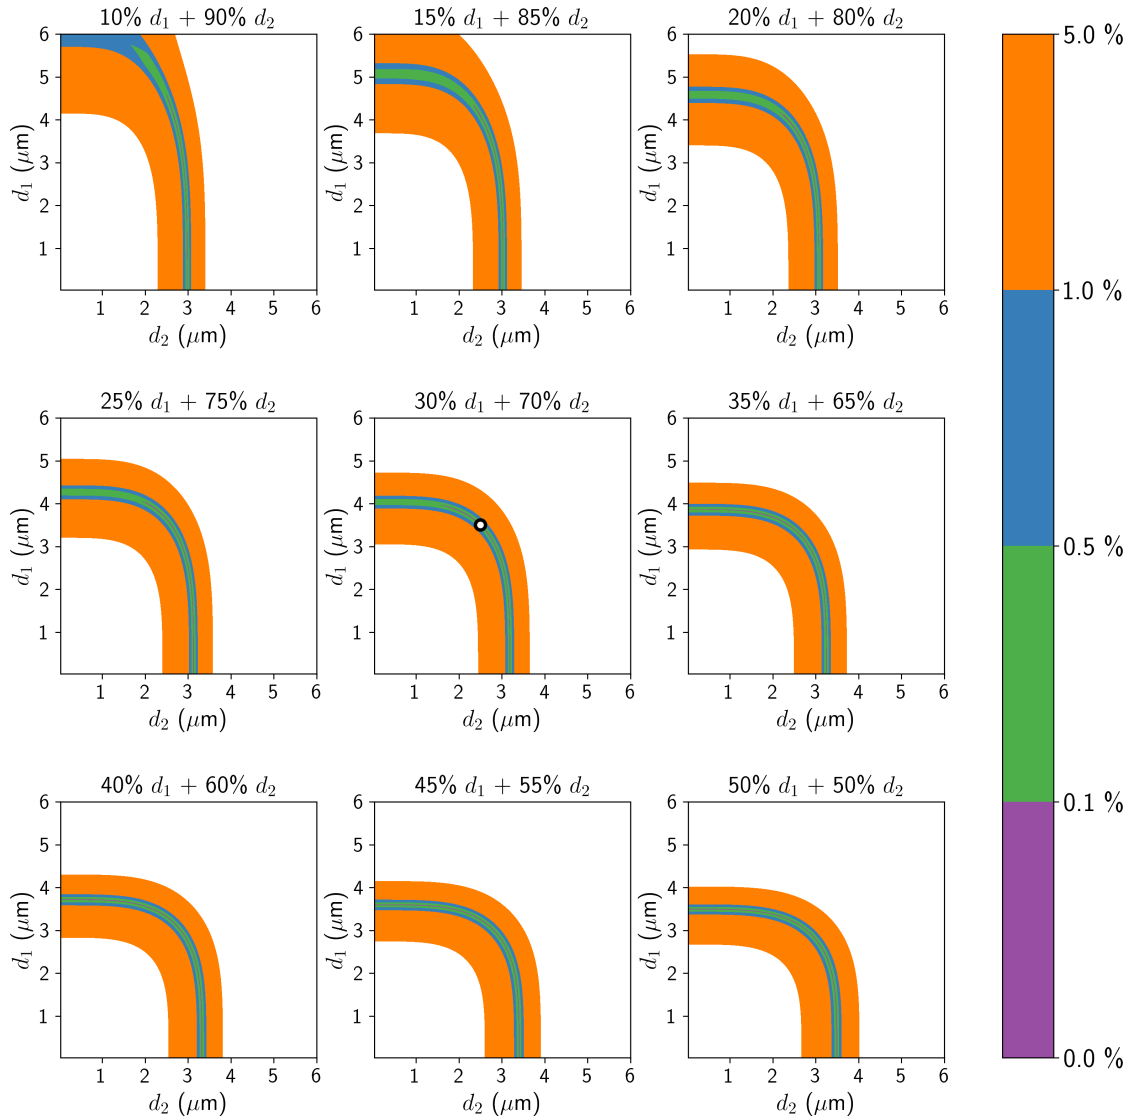

Figure 9: Example of the unresolvability of distribution fitting. The ground truth signal was generated from a combination of 2 parallel cylinders; 30% **signal fraction** with diameter  $d_1 = 3.5 \mu\text{m}$  and 70%  $d_2 = 2.5 \mu\text{m}$  (shown as white dot in the center plot) with in-vivo diffusivity ( $D_0 = 2 \mu\text{m}^2/\text{ms}$ ) and a Connectom-like acquisition with three different gradient pulse durations ( $G = 300 \text{ mT/m}$ ,  $\Delta = 50 \text{ ms}$ ,  $\delta = [30, 40, 50] \text{ ms}$ ). The parameters were selected so that the smallest diameter was comfortably above “typical” diameter limit for  $\delta = 30$  (compared to the limit for  $\text{SNR} = 30$ , this experiment is noiseless). The 9 subplots represent all combinations of diameters between 0.1 and  $6 \mu\text{m}$ , sliced uniformly at signal fractions between 10% and 50%. The blue “path” correspond to parameter combinations yielding a signal less than 1% **signal decay** different than the noiseless ground truth. It forms a surface spanning most of the 3D parameter space, rendering any distribution fitting impossible for non-absurd SNR.

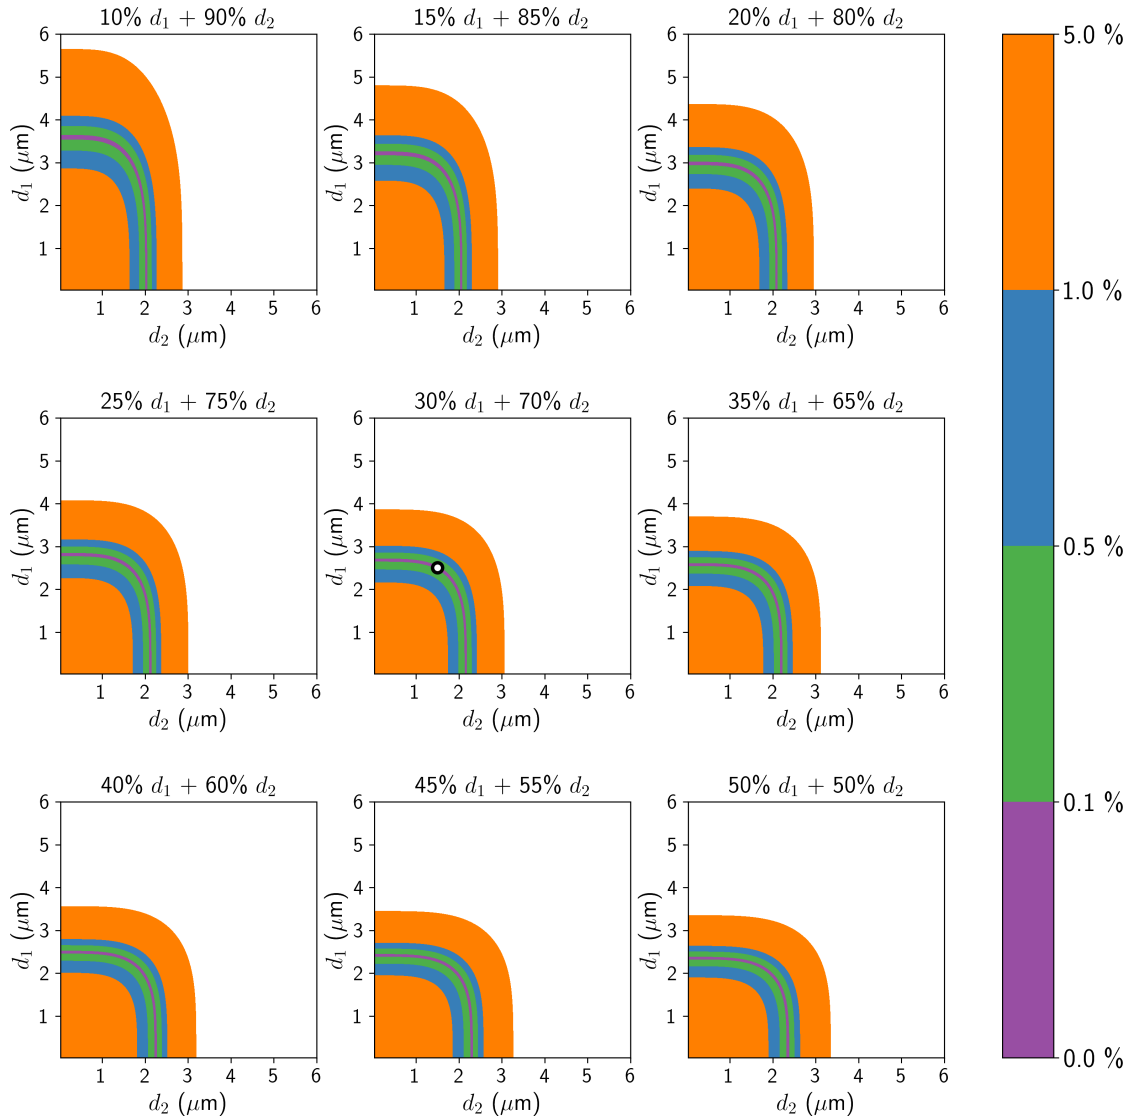

Figure 10: Example of the unresolvability of distribution fitting. The ground truth signal was generated from a combination of 2 parallel cylinders; 30% **signal fraction** with diameter  $d_1 = 2.5 \mu\text{m}$  and 70%  $d_2 = 1.5 \mu\text{m}$  (shown as white dot in the center plot) with in-vivo diffusivity ( $D_0 = 2 \mu\text{m}^2/\text{ms}$ ) and a Connectom-like acquisition with three different gradient pulse durations ( $G = 300 \text{ mT/m}$ ,  $\Delta = 50 \text{ ms}$ ,  $\delta = [30, 40, 50] \text{ ms}$ ). The parameters were selected so that the smallest diameter was comfortably above “typical” diameter limit for  $\delta = 30$  (compared to the limit for  $\text{SNR} = 30$ , this experiment is noiseless). The 9 subplots represent all combinations of diameters between 0.1 and  $6 \mu\text{m}$ , sliced uniformly at signal fractions between 10% and 50%. The blue “path” correspond to parameter combinations yielding a signal less than 1% **signal decay** different than the noiseless ground truth. It forms a surface spanning most of the 3D parameter space, rendering any distribution fitting impossible for non-absurd SNR.

## 554 Bibliography

## 555 References

- 556 [1] F. Aboitiz, A. B. Scheibel, R. S. Fisher, and E. Zaidel. Fiber composition of  
557 the human corpus callosum. *Brain Research*, 598(1):143–153, 1992.
- 558 [2] D. C. Alexander, P. L. Hubbard, M. G. Hall, E. A. Moore, M. Ptito, G. J. M.  
559 Parker, and T. B. Dyrby. Orientationally invariant indices of axon diameter  
560 and density from diffusion MRI. *NeuroImage*, 52(4):1374–89, 2010.
- 561 [3] M. Ashtarayeh, T. Streubel, J. Periquito, A. Pohlmann, T. Niendorf, E. Kir-  
562 ilina, M. Morawski, C. Jäger, S. Geyer, M. Barakovic, A. Daducci, and S. Mo-  
563 hammadi. Axon diameter estimation in fixed human optic chiasm using dif-  
564 fusion weighted MR microscopy and microstructure-informed tractography.  
565 *ISMRM*, 2019.
- 566 [4] Y. Assaf and P. Basser. Composite hindered and restricted model of diffusion  
567 (CHARMED) MR imaging of the human brain. *NeuroImage*, 27(1):48–58, 2005.
- 568 [5] Y. Assaf, T. Blumenfeld-Katzir, Y. Yovel, and P. J. Basser. AxCaliber: A  
569 method for measuring axon diameter distribution from diffusion MRI. *Magnetic  
570 Resonance in Medicine*, 59(6):1347–1354, 2008.
- 571 [6] M. Barakovic, G. Girard, D. P. R. Romascano, J. R. Patino Lopez, M. De-  
572 scoteaux, G. Innocenti, D. K. Jones, J.-P. Thiran, and A. Daducci. Assessing  
573 feasibility and reproducibility of a bundle-specific framework on in vivo axon  
574 diameter estimates at 300mT/m. *ISMRM*, 2018.
- 575 [7] M. Barakovic, D. P. R. Romascano, G. Girard, M. Descoteaux, J.-P. Thiran,  
576 and A. Daducci. In-vivo bundle-specific axon diameter distributions estimation  
577 across the corpus callosum. *ISMRM*, 2017.
- 578 [8] L. M. Burcaw, E. Fieremans, and D. S. Novikov. Mesoscopic structure of  
579 neuronal tracts from time-dependent diffusion. *NeuroImage*, 114:18–37, 2015.
- 580 [9] S. Coelho, J. M. Pozo, M. Costantini, J. R. Highley, M. Mozumder, J. E.  
581 Simpson, P. G. Ince, and A. F. Frangi. Local volume fraction distributions of  
582 axons, astrocytes, and myelin in deep subcortical white matter. *NeuroImage*,  
583 179:275–287, 2018.
- 584 [10] A. Daducci, E. J. Canales-Rodríguez, H. Zhang, T. B. Dyrby, D. C. Alexander,  
585 and J.-P. Thiran. Accelerated microstructure imaging via convex optimization  
586 (AMICO) from diffusion mri data. *NeuroImage*, 105:32 – 44, 2015.

- 587 [11] A. Daducci, A. Dal Palù, A. Lemkaddem, and J. P. Thiran. Commit: Con-  
588 vex optimization modeling for microstructure informed tractography. *IEEE*  
589 *Transactions on Medical Imaging*, 34(1):246–257, 2015.
- 590 [12] B. Dhital, M. Reisert, E. Kellner, and V. G. Kiselev. Intra-axonal diffusivity  
591 in brain white matter. *NeuroImage*, 189:543–550, 2019.
- 592 [13] M. Drakesmith, R. Harms, S. U. Rudrapatna, G. D. Parker, C. J. Evans, and  
593 D. K. Jones. Estimating axon conduction velocity in vivo from microstructural  
594 mri. *NeuroImage*, 203:116186, 2019.
- 595 [14] T. B. Dyrby, W. F. Baaré, D. C. Alexander, J. Jelsing, E. Garde, and  
596 L. V. Søgaard. An ex vivo imaging pipeline for producing high-quality and  
597 high-resolution diffusion-weighted imaging datasets. *Human Brain Mapping*,  
598 32(4):544–563, 2011.
- 599 [15] T. B. Dyrby, L. V. Sogaard, M. G. Hall, M. Ptito, and D. C. Alexander. Con-  
600 trast and stability of the axon diameter index from microstructure imaging with  
601 diffusion MRI. *Magnetic Resonance in Medicine*, 70(3):711–721, 2013.
- 602 [16] U. Grenander. On empirical spectral analysis of stochastic processes. *Arkiv för*  
603 *Matematik*, 1(6):503–531, 1952.
- 604 [17] H.-H. Lee, E. Fieremans, and D. S. Novikov. What dominates the time depen-  
605 dence of diffusion transverse to axons: Intra- or extra-axonal water? *NeuroIm-*  
606 *age*, 182:500–510, 2018.
- 607 [18] D. Liewald, R. Miller, N. Logothetis, H.-J. Wagner, and A. Schüz. Distribution  
608 of axon diameters in cortical white matter: an electron-microscopic study on  
609 three human brains and a macaque. *Biological Cybernetics*, 108(5):541–557,  
610 2014.
- 611 [19] J. A. McNab, B. L. Edlow, T. Witzel, S. Y. Huang, H. Bhat, K. Heberlein,  
612 T. Feiweier, K. Liu, B. Keil, J. Cohen-Adad, M. D. Tisdall, R. D. Folkerth,  
613 H. C. Kinney, and L. L. Wald. The Human Connectome Project and beyond:  
614 Initial applications of 300mT/m gradients. *NeuroImage*, 80:234–245, 2013.
- 615 [20] C. H. Neuman. Spin echo of spins diffusing in a bounded medium. *Journal of*  
616 *Chemical Physics*, 60(11):4508–4511, 1974.
- 617 [21] M. Nilsson, S. Lasič, I. Drobnjak, D. Topgaard, and C.-F. Westin. Resolution  
618 limit of cylinder diameter estimation by diffusion MRI: The impact of gradient  
619 waveform and orientation dispersion. *NMR in Biomedicine*, 30(7):e3711, 2017.

- 620 [22] D. S. Novikov, E. Fieremans, S. N. Jespersen, and V. G. Kiselev. Quantifying  
621 brain microstructure with diffusion MRI: Theory and parameter estimation.  
622 *NMR in Biomedicine*, 32(4):e3998, 2019.
- 623 [23] A. Roebroek, K. L. Miller, and M. Aggarwal. Ex vivo diffusion MRI of the  
624 human brain: Technical challenges and recent advances. *NMR in Biomedicine*,  
625 32(4):e3941, 2019.
- 626 [24] W. A. H. Rushton. A theory of the effects of fibre size in medullated nerve.  
627 *The Journal of Physiology*, 115(1):101–122, 1951.
- 628 [25] S. D. Santis, D. K. Jones, and A. Roebroek. Including diffusion time depen-  
629 dence in the extra-axonal space improves in vivo estimates of axonal diameter  
630 and density in human white matter. *NeuroImage*, 130:91–103, 2016.
- 631 [26] H. Schmidt and T. R. Knösche. Action potential propagation and synchroni-  
632 sation in myelinated axons. *PLOS Computational Biology*, 15(10):1–33, 2019.
- 633 [27] E. O. Stejskal and J. E. Tanner. Spin diffusion measurements: Spin echoes  
634 in the presence of a time-dependent field gradient. *The Journal of Chemical*  
635 *Physics*, 42(1):288–292, 1965.
- 636 [28] D. Topgaard. Multidimensional diffusion MRI. *Journal of Magnetic Resonance*,  
637 275:98–113, 2017.
- 638 [29] P. van Gelderen, D. Despres, P. C. M. van Zijl, and C. T. W. Moonen. Evalu-  
639 ation of restricted diffusion in cylinders. phosphocreatine in rabbit leg muscle.  
640 *Journal of Magnetic Resonance - Series B*, 103(3):255–260, 3 1994.
- 641 [30] J. Veraart, D. Nunes, U. Rudrapatna, E. Fieremans, D. K. Jones, D. S. Novikov,  
642 and N. Shemesh. Noninvasive quantification of axon radii using diffusion MRI.  
643 *eLife*, 9:e49855, 2020.
- 644 [31] H. Zhang, T. Schneider, C. A. Wheeler-Kingshott, and D. C. Alexander.  
645 NODDI: Practical in vivo neurite orientation dispersion and density imaging of  
646 the human brain. *NeuroImage*, 61(4):1000–1016, 2012.
